# Supplementary material
Source: PubMed Central journal article supplement (PMC5369603)
Supplement: NIHMS710111-supplement-Sup_Fig_1.pdf [file NIHMS710111-supplement-Sup_Fig_1.pdf]

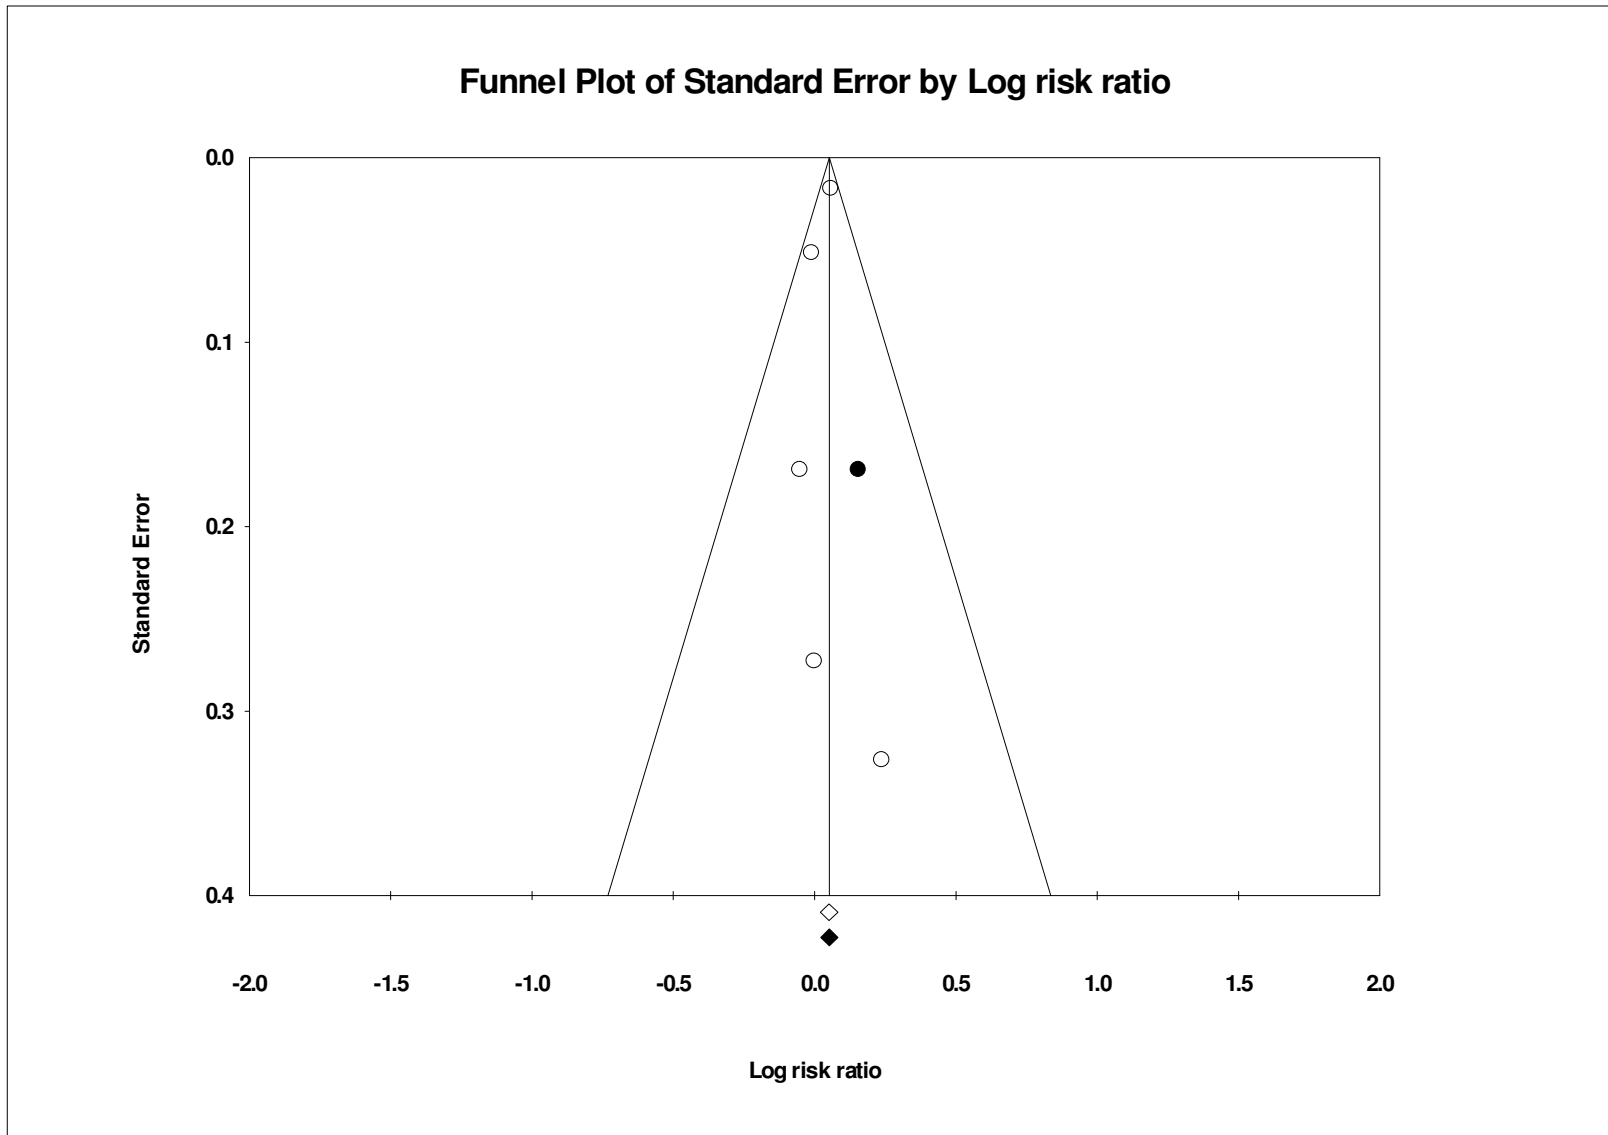

**Supplemental Figure 1.** Funnel plot of log RRs of studies on the association between periconceptional folic acid supplement use (vs. no use) and asthma or wheezing in childhood, against SEs of the log RRs. Open circles represent studies included in the analysis. Solid circle represents imputed study based on trim and fill. Open and solid diamonds represent summary effect without and with imputed study, respectively.
