# Supplementary material
Source: PubMed Central journal article supplement (PMC5369603)
Supplement: NIHMS710111-supplement-Sup_Table_2.pdf [file NIHMS710111-supplement-Sup_Table_2.pdf]

**SUPPLEMENTAL TABLE 2**

Methodological quality of cohort and nested case-control studies included in the meta-analysis (Newcastle Ottawa Scale)

| Cohort and nested case-control studies | Year | Representativeness of the exposed cohort | Selection of the unexposed cohort | Ascertainment of exposure | Outcome of interest not present at start of study | Control for important factor or additional factor <sup>a</sup> | Outcome assessment | Follow-up long enough for outcomes to occur <sup>b</sup> | Adequacy of follow-up of cohorts <sup>c</sup> | Total quality score |
|----------------------------------------|------|------------------------------------------|-----------------------------------|---------------------------|---------------------------------------------------|----------------------------------------------------------------|--------------------|----------------------------------------------------------|-----------------------------------------------|---------------------|
| Haberg (1)                             | 2009 | *                                        | *                                 |                           | *                                                 | **                                                             |                    |                                                          | *                                             | 6                   |
| Whitrow (2)                            | 2009 | *                                        | *                                 | *                         | *                                                 | **                                                             |                    | *                                                        | *                                             | 8                   |
| Magdelijns (3)                         | 2011 |                                          | *                                 |                           | *                                                 | **                                                             |                    | *                                                        | *                                             | 6                   |
| Martinussen (4)                        | 2011 | *                                        | *                                 | *                         | *                                                 | **                                                             |                    | *                                                        | *                                             | 8                   |
| Kiefte-de Jong (5)                     | 2012 | *                                        | *                                 |                           | *                                                 | **                                                             |                    |                                                          | *                                             | 6                   |

a: A maximum of 2 stars could be awarded for this item. Studies that controlled for parental/familial asthma/atopy received one star, whereas studies that controlled for other important confounders such as income, smoking during pregnancy, ethnicity, maternal parity, maternal age at pregnancy, maternal BMI, maternal education level, infant's sex, infant's birth weight/getstation age at birth, maternal alcohol consumption during birth, maternal use of other vitamins, breastfeeding duration, child daycare attendance in the first 24 mo of life, exposure to environmental tobacco smoke and domestic animals, etc., received an additional star.

b: A cohort study with a follow-up time  $\geq 5$  years was assigned one star.

c: A cohort study with a follow-up rate  $>70\%$  was assigned one star.

## References

1. Haberg SE, London SJ, Stigum H, Nafstad P, Nystad W. Folic acid supplements in pregnancy and early childhood respiratory health.[Erratum appears in Arch Dis Child. 2009 Jun;94(6):485]. Arch Dis Child 2009;94(3):180-4. doi: 10.1136/adc.2008.142448.
2. Whitrow MJ, Moore VM, Rumbold AR, Davies MJ. Effect of supplemental folic acid in pregnancy on childhood asthma: A prospective birth cohort study. Am J Epidemiol 2009;170(12):1486-93. doi: 10.1093/aje/kwp315.
3. Magdelijns FJH, Mommers M, Penders J, Smits L, Thijs C. Folic acid use in pregnancy and the development of atopy, asthma, and lung function in childhood. Pediatrics 2011;128(1):e135-44. doi: 10.1542/peds.2010-1690.
4. Martinussen MP, Risnes KR, Jacobsen GW, Bracken MB. Folic acid supplementation in early pregnancy and asthma in children aged 6 years. Am J Obstet Gynecol 2012;206(1):72.e1-7. doi: 10.1016/j.ajog.2011.07.033.
5. Kiefte-de Jong JC, Timmermans S, Jaddoe VW, Hofman A, Tiemeier H, Steegers EA, de Jongste JC, Moll HA. High circulating folate and vitamin B-12 concentrations in women during pregnancy are associated with increased prevalence of atopic dermatitis in their offspring. J Nutr 2012. doi: 10.3945/jn.111.154948.
