# Supplementary material
Source: PubMed Central journal article supplement (PMC5369603)
Supplement: NIHMS710111-supplement-Sup_Text_2.pdf [file NIHMS710111-supplement-Sup_Text_2.pdf]

# Prenatal folic acid and the risk of asthma in children: A systematic review and meta-analysis

## Search Strategies

### Databases used:

Medline (Ovid)  
Pubmed  
Embase (Ovid)  
CINAHL (EbscoHost)  
Cochrane Library  
Web of Science  
ERIC (ProQuest)  
POPLINE

**Limits:** NONE

---

### MEDLINE

#### A. Folic Acid

(folic acid or folate or folacin or vitamin B9).tw,de

#### B. Asthma

exp asthma/ or exp Bronchial Hyperreactivity/ or \*Respiratory sounds/ or (asthma\* or respiratory or wheez\* or reactive airway\* or atopy or allerg\*).tw,de

### PUBMED

#### A. Folic Acid

"folic acid" OR folate OR folacin OR "vitamin B9"

#### B. Asthma

"Asthma"[Mesh] OR "Bronchial Hyperreactivity"[Mesh] OR "Respiratory Sounds"[Majr:NoExp] OR asthma\* OR respiratory OR wheez\* OR "reactive airway\*" OR atopy OR allerg\*

### EMBASE

#### A. Folic Acid

(folic acid or folate or folacin or vitamin B9).tw,de

#### B. Asthma

exp asthma/ or exp Bronchus Hyperreactivity/ or exp abnormal respiratory sound/ or (asthma\* or respiratory or wheez\* or reactive airway\* or atopy or allerg\*).tw,de

### CINAHL

#### A. Folic Acid

(folic acid or folate or folacin or vitamin B9)

#### B. Asthma

(MH "Asthma+") OR (MH "Respiratory Sounds") or (asthma\* or respiratory or wheez\* or reactive airway\* or atopy or allerg\*)  
*exclude Medline*

## **COCHRANE**

### **A. Folic Acid**

(folic acid or folate or folacin or vitamin B9):ti,ab,kw

### **B. Asthma**

(MeSH descriptor Asthma explode all trees) or (MeSH descriptor Bronchial Hyperreactivity explode all trees) or (MeSH descriptor Respiratory Sounds explode all trees) or (asthma\* or respiratory or wheez\* or reactive airway\* or atopy or allerg\*):ti,ab,kw

## **WEB OF SCIENCE**

### **A. Folic Acid**

TS=(folic acid or folate or folacin or vitamin B9)

### **B. Asthma**

TS=(asthma\* or respiratory or wheez\* or reactive airway\* or atopy or allerg\*)

## **ERIC**

### **A. Folic Acid**

ALL(folic acid or folate or folacin or vitamin B9)

### **B. Asthma**

All(asthma\* or respiratory or wheez\* or reactive airway\* or atopy or allerg\*)

## **POPLINE**

### **Title/Keywords OR Abstract**

(folic acid / folate / folacin / vitamin B9) & (asthma\* / respiratory / wheez\* / airway\* / atopy / allerg\*)
